# Supplementary material
Source: publisher figshare collection journal article supplement (https://brill.figshare.com/ndownloader/files/13563536)
Supplement: Supplementary file 1 [file 13563536]

## Sheet: AppendixS1
Using floristic characteristics of contemporary vegetation for identifying archaeological sites: Tel ‘Eton archaeological site as a test case
Yair Sapir(a), Yuval Sapir(b) and Avraham Faust(a)
aThe Institute of Archaeology, The Martin (Szusz) Department of Land of Israel Studies and Archaeology, Bar Ilan University, Ramat-Gan, 5290002 Israel; bThe Botanical Garden, School of Plant Sciences and Food Security, Tel Aviv University, Tel Aviv, 69978 Israel
Supplementary material
Appendix S1. Raw data and sumamry of plant species recorded in all plots in the study area.
Plant names and synanthropism are according Danin, A. & O. Fragman- Sapir. 2016+ Flora of Israel Online. http://flora.org.il/en/plants/
				# times appeared in plot
Species	Family	synanthrop	Total	T	F	G	C	G6	G7	G8	G9	G10	G11	G12	G13	G14	G15	G16	G17	G18	G19	G20	G21	T1	T2	T3	T4	T5	T6	T7	T8	T9	T10	T11	T12	T13	T14	T15	F1	F2	F3	F4	F5	F6	F7	F8	F9	F10	F11
Alopecurus utriculatus	Poaceae	Mostly natural, also synanthropic	1	0	0	1	0							1
Anchusa undulata	Boraginaceae	Obligate natural	1	0	0	1	0									1
Anemone coronaria	Ranunculaceae	Obligate natural	4	1	2	1	0											1																1												1
Anthemis pseudocotula	Compositae	Mostly natural, also synanthropic	1	1	0	0	0																												1
Anthemis sp.	Compositae	-	1	0	0	1	0									1
Arrhenatherum palaestinum	Poaceae	Obligate natural	1	1	0	0	0																													1
Asterolinon linum-stellatum	Primulaceae	Obligate natural	3	1	1	1	0											1									1																				1
Avena sterilis	Poaceae	Mostly natural, also synanthropic	51	11	11	14	15	1		1	1	1	1	1	1	1	1	1		1	1	1	1	1			1	1	1	1		1	1	1	1		1	1	1	1	1		1			1	1	1	1
Bromus fasciculatus	Poaceae	Obligate natural	6	4	2	0	0																		1			1		1				1								1
Bromus madritensis	Poaceae	Obligate natural	1	0	0	1	0											1
Carduus argentatus	Compositae	Approximately synanthropic = natural	1	1	0	0	0																									1
Carex pachystylis	Cyperaceae	Obligate natural	2	2	0	0	0																									1						1
Carthamus glaucus	Compositae	Approximately synanthropic = natural	1	0	0	1	0					1
Cnicus benedictus	Compositae	Obligate natural	1	1	0	0	0																													1
Crepis aspera	Compositae	Mostly natural, also synanthropic	12	5	0	7	0					1	1			1	1	1	1				1	1			1						1	1	1
Crepis sancta	Compositae	Mostly natural, also synanthropic	6	1	0	5	0							1			1		1	1	1				1
Crupina crupinastrum	Compositae	Obligate natural	2	0	0	2	0									1	1
Cynodon dactylon	Poaceae	Approximately synanthropic = natural	5	0	0	0	5
Echinops polyceras	Compositae	Mostly natural, also synanthropic	3	1	2	0	0																			1																		1		1
Erodium ciconium	Geraniaceae	Mostly natural, also synanthropic	6	0	5	1	0										1																						1										1
Erodium laciniatum	Geraniaceae	Obligate natural	8	0	5	3	0		1								1	1																							1		1				1	1
Galium setaceum	Rubiaceae	Obligate natural	1	0	1	0	0																																							1
Geropogon hybridus	Compositae	Obligate natural	2	1	0	1	0									1											1
Gypsophila capillaris	Caryophyllaceae	Obligate natural	5	1	2	2	0						1						1								1																1			1
Helianthemum salicifolium	Cistaceae	Mostly natural, also synanthropic	2	2	0	0	0																	1											1
Helichrysum sanguineum	Compositae	Obligate natural	1	0	0	1	0				1
Hordeum spontaneum	Poaceae	Mostly natural, also synanthropic	7	5	2	0	0																		1			1	1							1	1								1			1
Hymenocarpos circinnatus	Leguminosae	Mostly natural, also synanthropic	1	0	0	0	1
Lathyrus aphaca	Leguminosae	Mostly natural, also synanthropic	6	5	1	0	0																				1		1		1				1		1
Linum strictum	Linaceae	Obligate natural	6	4	2	0	0																				1				1				1			1			1		1
Lotus peregrinus	Leguminosae	Obligate natural	3	3	0	0	0																	1				1										1
Majorana syriaca	Lamiaceae	Obligate natural	1	1	0	0	0																									1
Malabaila secacul	Apiaceae	Mostly natural, also synanthropic	1	0	1	0	0
Medicago coronata	Leguminosae	Obligate natural	2	0	2	0	0																																				1	1
Minuartia mediterranea	Caryophyllaceae	Obligate natural	1	1	0	0	0																				1
Ononis mollis	Leguminosae	Obligate natural	1	1	0	0	0																										1
Ononis sicula	Leguminosae	Obligate natural	7	6	1	0	0																	1		1			1				1	1				1				1
Pallenis spinosa	Compositae	Obligate natural	6	0	1	0	5																																					1
Phagnalon rupestre	Compositae	Mostly natural, also synanthropic	1	0	0	1	0						1
Pimpinella cretica	Apiaceae	Obligate natural	5	1	4	0	0																				1												1				1	1
Plantago albicans	Plantaginaceae	Obligate natural	9	6	2	1	0											1						1	1	1		1							1		1							1					1
Plantago cretica	Plantaginaceae	Obligate natural	1	0	0	0	1
Poa bulbosa	Poaceae	Mostly natural, also synanthropic	4	2	1	0	1																		1	1																		1
Ranunculus asiaticus	Ranunculaceae	Obligate natural	4	1	1	2	0						1										1			1																		1
Rostraria cristata	Poaceae	Obligate natural	4	3	0	1	0										1													1					1			1
Scaligeria napiformis	Apiaceae	Obligate natural	1	0	1	0	0																																							1
Scrophularia rubricaulis	Scrophulariaceae	Obligate natural	1	0	0	1	0										1
Silene colorata	Caryophyllaceae	Mostly natural, also synanthropic	5	5	0	0	0																	1		1	1		1				1
Silene decipiens	Caryophyllaceae	Mostly natural, also synanthropic	1	1	0	0	0																		1
Sonchus oleraceus	Compositae	Mostly synanthropic, also natural	1	0	0	1	0								1
Stipa capensis	Poaceae	Obligate natural	34	15	9	9	1		1		1	1	1	1		1	1	1	1					1	1	1	1	1	1	1	1	1	1	1	1	1	1	1	1		1		1	1		1	1		1
Teucrium capitatum	Lamiaceae	Obligate natural	2	0	2	0	0																																			1
Theligonum cynocrambe	Rubiaceae	Mostly natural, also synanthropic	1	0	1	0	0																																							1
Tolpis virgata	Compositae	Approximately synanthropic = natural	1	0	1	0	0
Tordylium trachycarpum	Apiaceae	Mostly natural, also synanthropic	14	6	6	2	0									1			1						1		1			1	1			1	1							1		1	1	1			1
Torilis leptophylla	Apiaceae	Obligate natural	1	0	0	1	0							1
Torilis tenella	Apiaceae	Obligate natural	3	0	3	0	0																																				1	1		1
Trifolium prophetarum	Leguminosae	Obligate natural	2	2	0	0	0																	1							1
Trifolium sp.	Leguminosae	-	1	1	0	0	0																												1
Trifolium tomentosum	Leguminosae	Obligate natural	1	0	1	0	0																																										1
Trisetaria macrochaeta	Poaceae	Obligate natural	6	6	0	0	0																	1			1	1			1				1	1
Un-identified	-	-	5	1	1	2	1	1									1									1
Urospermum picroides	Compositae	Approximately synanthropic = natural	13	4	7	0	2																							1	1			1				1				1	1	1	1	1			1
Vicia palaestina	Leguminosae	Mostly natural, also synanthropic	2	0	0	2	0							1				1
Vicia peregrina	Leguminosae	Mostly natural, also synanthropic	3	1	1	1	0												1					1
Vicia sativa	Leguminosae	Mostly natural, also synanthropic	6	5	1	0	0																		1			1	1	1			1							1
Vulpia myuros	Poaceae	Mostly natural, also synanthropic	1	1	0	0	0																										1
Total # of speceis				40	32	28	9	2	2	1	3	4	6	6	2	8	10	9	6	2	2	1	3	11	9	8	13	8	7	7	7	5	8	8	12	5	5	8	4	2	4	5	9	11	3	11	4	3	7
[truncated: 18 more columns]
